# Supplementary material for: Deep Learning-Based Classification of Dysphagia Severity Using M-Mode Ultrasound Imaging
Source: Research Square preprint supplement (doi:10.21203/rs.3.rs-7823321/v1), 2025-10-29
Supplement: Supplementary file 2 [file ff65dec8e9fecffee0a78caf.docx]

Supplementary Table 1. Comparison of baseline characteristics between training and test sets

| **Variable** | | | **Training**  **(n = 245)** | **Test**  **(n = 110)** | **-value** |
| --- | --- | --- | --- | --- | --- |
| Age, year | | | 72.0 (63.0-82.0) | 73.0 (66.0-80.75) | 0.295 |
| Sex | | | | | 0.794 |
|  | Male | | 144 (58.8) | 67 (60.9) |
|  | Female | | 101 (41.2) | 43 (39.1) |
| Height, m | | | 1.61 (1.55-1.70) | 1.63 (1.58-1.69) | 0.800 |
| Weight, kg | | | 61.0 (55.0-70.0) | 60.0 (53.78-68.0) | 0.400 |
| BMI, kg/ | | | 23.88 (20.99-26.04) | 23.33 (20.86-26.65) | 0.492 |
| Primary diagnosis | | | | | 0.184 |
|  | | Cerebrovascular disease | 206 (84.1) | 93 (84.5) |
|  | | Neurodegenerative disease | 7 (2.9) | 7 (6.4) |
|  | | Others | 32 (13.1) | 10 (9.1) |
| Dysphagia severity | | | | | 0.796 |
|  | Mild | | 172 (70.2) | 75 (68.2) |
|  | Severe | | 73 (29.8) | 35 (31.8) |

Data are presented as median (interquartile range) for continuous variables and as frequencies (percentages) for categorical variables. BMI, body mass index.

**Supplementary Table 2.** Comparison of QMD parameters between mild and severe dysphagia groups.

| **Variable** | **Mild**  **(n = 878)** | **Severe**  **(n = 306)** | **-value** |
| --- | --- | --- | --- |
| QMD_sup2 | 0.0 (0.0-9.75) | 0.0 (0.0-22.75) | 0.017 |
| QMD_sup1 | 14.0 (0.0-96.50) | 23.50 (0.0-134.75) | 0.010 |
| QMD_ref | 144.0 (101.0-200.0) | 205.0 (115.0-304.0) | <0.001 |
| QMD_inf1 | 69.50 (34.0-124.0) | 109.50 (33.0-222.0) | <0.001 |
| QMD_inf2 | 35.0 (9.0-74.0) | 43.0 (5.0-172.0) | 0.007 |
| QMD_inf3 | 20.0 (0.0-48.0) | 11.50 (0.0-69.25) | 0.661 |
| QMD_inf4 | 5.0 (0.0-30.0) | 0.0 (0.0-27.50) | 0.118 |
| QMD_inf5 | 0.0 (0.0-14.0) | 0.0 (0.0-6.0) | 0.038 |
| QMD_inf6 | 0.0 (0.0-1.75) | 0.0 (0.0-0.0) | 0.034 |
| QMD_inf7 | 0.0 (0.0-0.0) | 0.0 (0.0-0.0) | 0.029 |

Data are presented as median (interquartile range). Statistical comparisons performed using Mann-Whitney U test. QMD, quantitative muscle movement duration; ref, reference line; sup, superior (above reference); inf, inferior (below reference).
